# Supplementary material
Source: Royal Society of Chemistry journal article supplement (doi:10.1039/d6dt00077k)
Supplement: d6dt00077k1.pdf [file d6dt00077k1.pdf]

# Supporting Information

## **Organic-Inorganic hybrid materials with high phase transition temperatures regulated by halogen substitution**

Jie-Yu Zhu,<sup>a†</sup> Cheng-Fang Zhang,<sup>a†</sup> Runtian Zhu,<sup>a</sup> Qing-Ling Cao,<sup>a</sup> Wen-He Zhong,<sup>a</sup>  
Jia-Jia Zhao,<sup>\*a</sup> and Li-Zhuang Chen,<sup>\*a</sup>

<sup>a</sup>School of Environmental and Chemical Engineering, Jiangsu University of Science  
and Technology, Zhenjiang 212003 (China)

\*Corresponding author

Email address: clz1977@sina.com (L.-Z. Chen); zhaojjia@just.edu.cn (J.-J. Zhao)

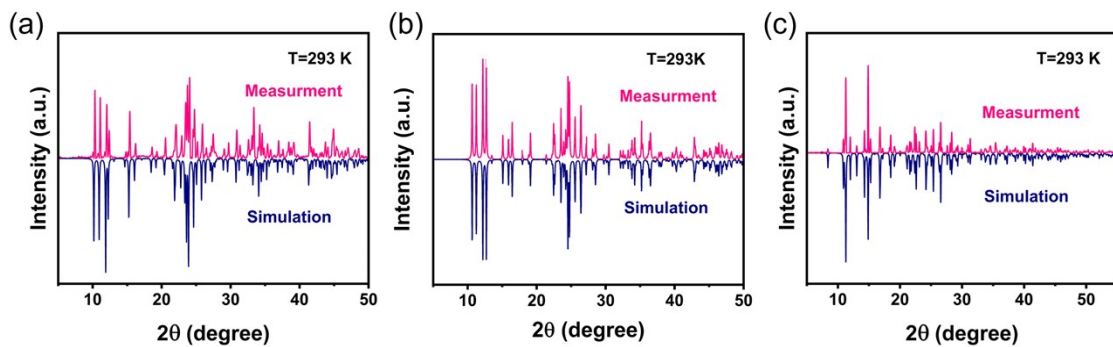

**Fig. S1** Powder X-ray diffraction (PXRD) of crystal **1** (a), **2** (b) and **3** (c)

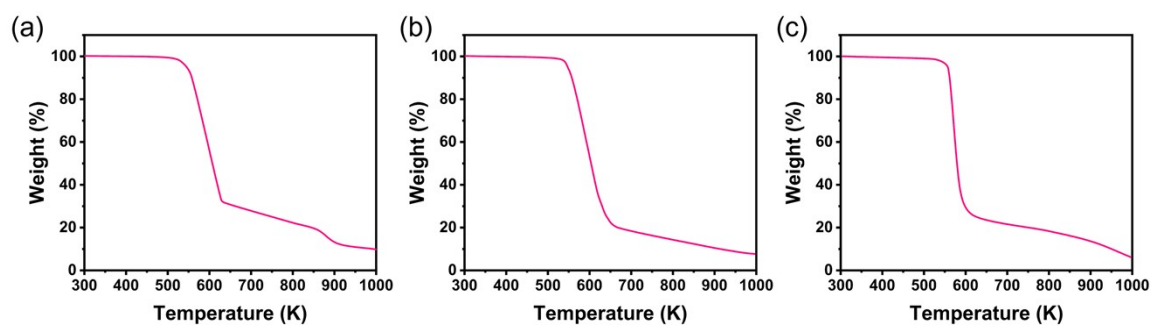

**Fig. S2** The TG curves for **1-3** (a-d), indicating that the three crystals are stable at least up to 600 K

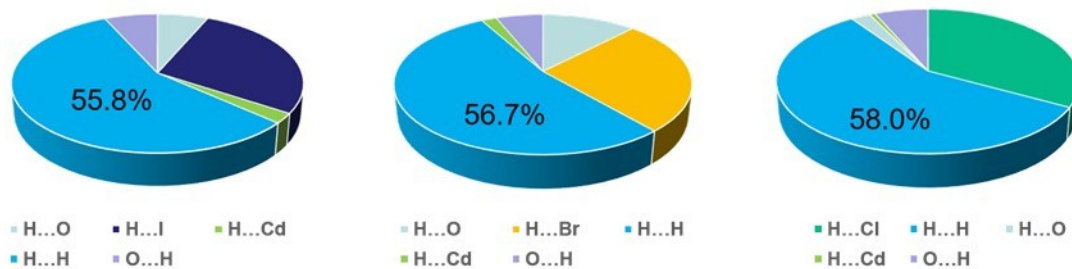

**Fig. S3** Distribution of intermolecular interactions in crystals **1-3** and their percentages

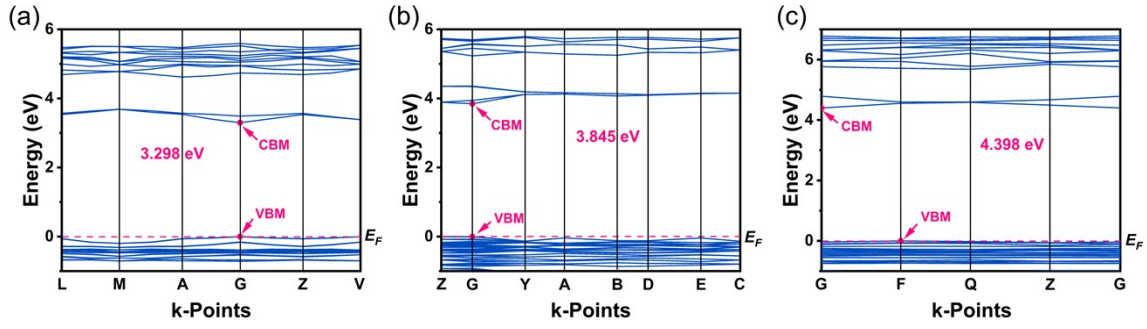

Fig. S4 The calculated band structure of crystal 1 (a), 2 (b) and 3 (c)

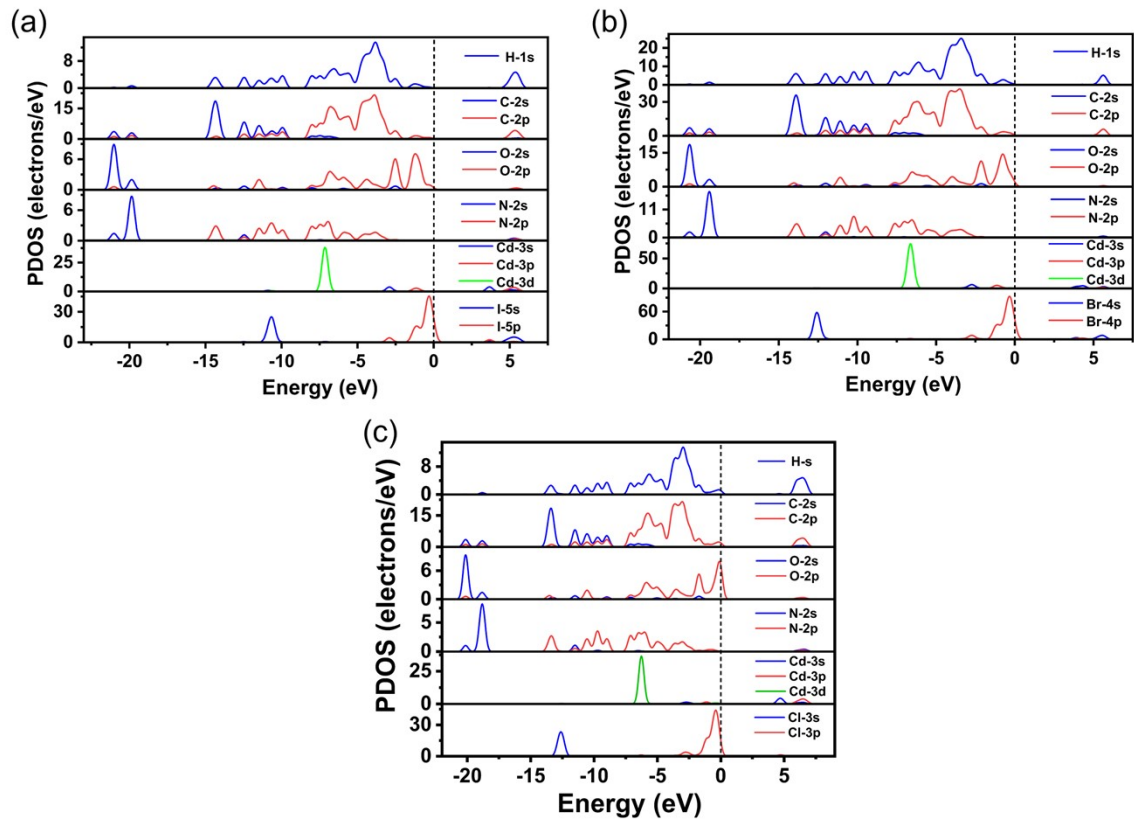

Fig. S5 Partial density of states (PDOS) of crystal 1 (a), 2 (b) and 3 (c)

The optical bandgap ( $E_g$ ) of the crystals was determined using the Tauc equation.

$$(\alpha h\nu)^n = A(h\nu - E_g)$$

Where:

- $\alpha$  is the absorption coefficient, derived from the Kubelka-Munk function  $F(R) = (1-R)^2/2R$  (where  $R$  is the reflectance);
- $h$  is Planck's constant;
- $\nu$  is the photon frequency;

- $A$  is a constant of proportionality;
- $n$  is an index that characterizes the type of electronic transition. For the direct allowed transitions typically observed in these  $[\text{C}_6\text{H}_{14}\text{NO}]_2\text{CdX}_4$  hybrid materials,  $n = 2$ .

**Table S1.** Crystal data and structure refinements for crystals **1-3** at 296.15 K.

| Moiety formula                               | [C <sub>6</sub> H <sub>14</sub> NO] <sub>2</sub> CdI <sub>4</sub> | [C <sub>6</sub> H <sub>14</sub> NO] <sub>2</sub> CdBr <sub>4</sub> | [C <sub>6</sub> H <sub>14</sub> NO] <sub>2</sub> CdCl <sub>4</sub> |
|----------------------------------------------|-------------------------------------------------------------------|--------------------------------------------------------------------|--------------------------------------------------------------------|
| T (K)                                        | 296.15                                                            | 296.15                                                             | 296.15                                                             |
| Formula weight                               | 852.36                                                            | 664.40                                                             | 486.56                                                             |
| Crystal system                               | monoclinic                                                        | monoclinic                                                         | triclinic                                                          |
| Space group                                  | <i>C2/c</i>                                                       | <i>C2/c</i>                                                        | <i>P-1</i>                                                         |
| <i>a</i> /Å                                  | 13.548(3)                                                         | 13.1657(11)                                                        | 8.3016(3)                                                          |
| <i>b</i> /Å                                  | 10.083(3)                                                         | 9.811(9)                                                           | 10.5798(4)                                                         |
| <i>c</i> /Å                                  | 17.418(4)                                                         | 16.6682 (12)                                                       | 12.1096(4)                                                         |
| <i>α</i> /deg                                | 90.00                                                             | 90                                                                 | 89.598(2)                                                          |
| <i>β</i> /deg                                | 93.764(13)                                                        | 95.053(5)                                                          | 79.447(2)                                                          |
| <i>γ</i> /deg                                | 90.00                                                             | 90                                                                 | 83.943(2)                                                          |
| Volume (Å <sup>3</sup> )                     | 2374.3(10)                                                        | 2144.7(3)                                                          | 1039.67(6)                                                         |
| Z                                            | 4                                                                 | 4                                                                  | 2                                                                  |
| D <sub>c</sub> (g/cm <sup>-3</sup> )         | 2.385                                                             | 2.058                                                              | 1.554                                                              |
| M (mm <sup>-1</sup> )                        | 6.126                                                             | 8.475                                                              | 1.568                                                              |
| F (000)                                      | 1560.0                                                            | 1272.0                                                             | 492.0                                                              |
| 2θ range [°]                                 | 4.68 to 54.2                                                      | 4.9 to 54.88                                                       | 3.44 to 55.02                                                      |
| Reflections collected                        | 11303                                                             | 4832                                                               | 12761                                                              |
| R <sub>1</sub> , wR <sub>2</sub> [I>=2σ (I)] | 0.0261, 0.0605                                                    | 0.0320, 0.0623                                                     | 0.0285, 0.0716                                                     |
| R <sub>1</sub> , wR <sub>2</sub> [all data]  | 0.0297, 0.0624                                                    | 0.0568, 0.0685                                                     | 0.0308, 0.0746                                                     |
| GOF                                          | 1.157                                                             | 1.018                                                              | 0.967                                                              |
| Largest peak and hole<br>(e/Å <sup>3</sup> ) | 0.75 and -1.36                                                    | 0.56 and -0.59                                                     | 0.69 and -0.61                                                     |

**Table S2.** Cd-I Bond Lengths [Å] and I-Cd-I Bond Angles [°] of Crystal **1**

| Atom-Atom                         | Length/ Å | Atom-Atom-Atom                                      | Angle/°     |
|-----------------------------------|-----------|-----------------------------------------------------|-------------|
| I <sup>1</sup> - Cd <sup>2</sup>  | 2.7726(6) | I <sup>1</sup> - Cd <sup>2</sup> - I <sup>11</sup>  | 107.72(3)   |
| Cd <sup>2</sup> - I <sup>11</sup> | 2.7726(6) | I <sup>31</sup> - Cd <sup>2</sup> - I <sup>11</sup> | 108.002(17) |
| Cd <sup>2</sup> - I <sup>31</sup> | 2.7659(6) | I <sup>31</sup> - Cd <sup>2</sup> - I <sup>1</sup>  | 107.756(4)  |
| Cd <sup>2</sup> - I <sup>3</sup>  | 2.7659(6) | I <sup>3</sup> - Cd <sup>2</sup> - I <sup>11</sup>  | 107.756(4)  |
|                                   |           | I <sup>3</sup> - Cd <sup>2</sup> - I <sup>1</sup>   | 108.002(17) |
|                                   |           | I <sup>3</sup> - Cd <sup>2</sup> - I <sup>31</sup>  | 117.26(3)   |

**Table S3.** Cd-Br Bond Lengths [ $\text{\AA}$ ] and Br-Cd-Br Bond Angles [ $^\circ$ ] of Crystal **2**

| Atom-Atom                          | Length/ $\text{\AA}$ | Atom-Atom-Atom                                        | Angle/ $^\circ$ |
|------------------------------------|----------------------|-------------------------------------------------------|-----------------|
| Cd <sup>1</sup> - Br <sup>21</sup> | 2.5896(5)            | Br <sup>2</sup> - Cd <sup>1</sup> - Br <sup>21</sup>  | 107.55(2)       |
| Cd <sup>1</sup> - Br <sup>2</sup>  | 2.5896(5)            | Br <sup>31</sup> - Cd <sup>1</sup> - Br <sup>2</sup>  | 105.257(16)     |
| Cd <sup>1</sup> - Br <sup>31</sup> | 2.5640(4)            | Br <sup>31</sup> - Cd <sup>1</sup> - Br <sup>21</sup> | 109.657(15)     |
| Cd <sup>1</sup> - Br <sup>3</sup>  | 2.5640(4)            | Br <sup>3</sup> - Cd <sup>1</sup> - Br <sup>21</sup>  | 105.257(16)     |
|                                    |                      | Br <sup>3</sup> - Cd <sup>1</sup> - Br <sup>2</sup>   | 109.657(15)     |
|                                    |                      | Br <sup>31</sup> - Cd <sup>1</sup> - Br <sup>3</sup>  | 119.03(3)       |

**Table S4.** Cd-Cl Bond Lengths [ $\text{\AA}$ ] and Cl-Cd-Cl Bond Angles [ $^\circ$ ] of Crystal **3**

| Atom-Atom                         | Length/ $\text{\AA}$ | Atom-Atom-Atom                                      | Angle/ $^\circ$ |
|-----------------------------------|----------------------|-----------------------------------------------------|-----------------|
| Cd <sup>1</sup> - Cl <sup>1</sup> | 2.4593(7)            | Cl <sup>2</sup> - Cd <sup>1</sup> - Cl <sup>1</sup> | 108.94(3)       |
| Cd <sup>1</sup> - Cl <sup>2</sup> | 2.4474(7)            | Cl <sup>2</sup> - Cd <sup>1</sup> - Cl <sup>3</sup> | 105.94(3)       |
| Cd <sup>1</sup> - Cl <sup>3</sup> | 2.4551 (7)           | Cl <sup>3</sup> - Cd <sup>1</sup> - Cl <sup>1</sup> | 108.222)        |
| Cd <sup>1</sup> - Cl <sup>4</sup> | 2.4270(7)            | Cl <sup>4</sup> - Cd <sup>1</sup> - Cl <sup>1</sup> | 107.19(3)       |
|                                   |                      | Cl <sup>4</sup> - Cd <sup>1</sup> - Cl <sup>2</sup> | 108.18(3)       |
|                                   |                      | Cl <sup>4</sup> - Cd <sup>1</sup> - Cl <sup>3</sup> | 118.13(3)       |
